# Supplementary material for: Gut microbiota regulates acute myeloid leukaemia via alteration of intestinal barrier function mediated by butyrate
Source: PubMed Central journal article supplement (PMC9085760; doi:10.1038/s41467-022-30240-8), 2022-05-09
Supplement: 41467_2022_30240_MOESM1_ESM.pdf [file 41467_2022_30240_MOESM1_ESM.pdf]

## **Supplementary Information File**

### **Gut microbiota regulates acute myeloid leukaemia via alteration of intestinal barrier function mediated by butyrate**

Ruiqing Wang<sup>1</sup>, Xinyu Yang<sup>1</sup>, Jinting Liu<sup>1</sup>, Fang Zhong<sup>2</sup>, Chen Zhang<sup>1</sup>, Yuhong Chen<sup>1</sup>,  
Tao Sun<sup>1</sup>, Chunyan Ji<sup>1</sup>, Daoxin Ma<sup>1\*</sup>

<sup>1</sup>Department of Hematology, Qilu Hospital of Shandong University, Jinan, Shandong 250012, P.R. China; <sup>2</sup>Department of Endocrinology and Metabolism, Shandong Provincial Hospital affiliated with Shandong University, Jinan, Shandong 250012, P.R. China

Corresponding author: Daoxin Ma, Professor

Address: Department of Hematology, Qilu Hospital of Shandong University, Jinan, Shandong 250012, P.R. China

Phone: 86-0531-82169887      Fax: 86-0531-86927544

E-mail address: [daoxinma@sdu.edu.cn](mailto:daoxinma@sdu.edu.cn)

#### **This file includes:**

Supplementary Figures 1 to 11

Supplementary Tables 1 to 3



# Supplementary figure 1

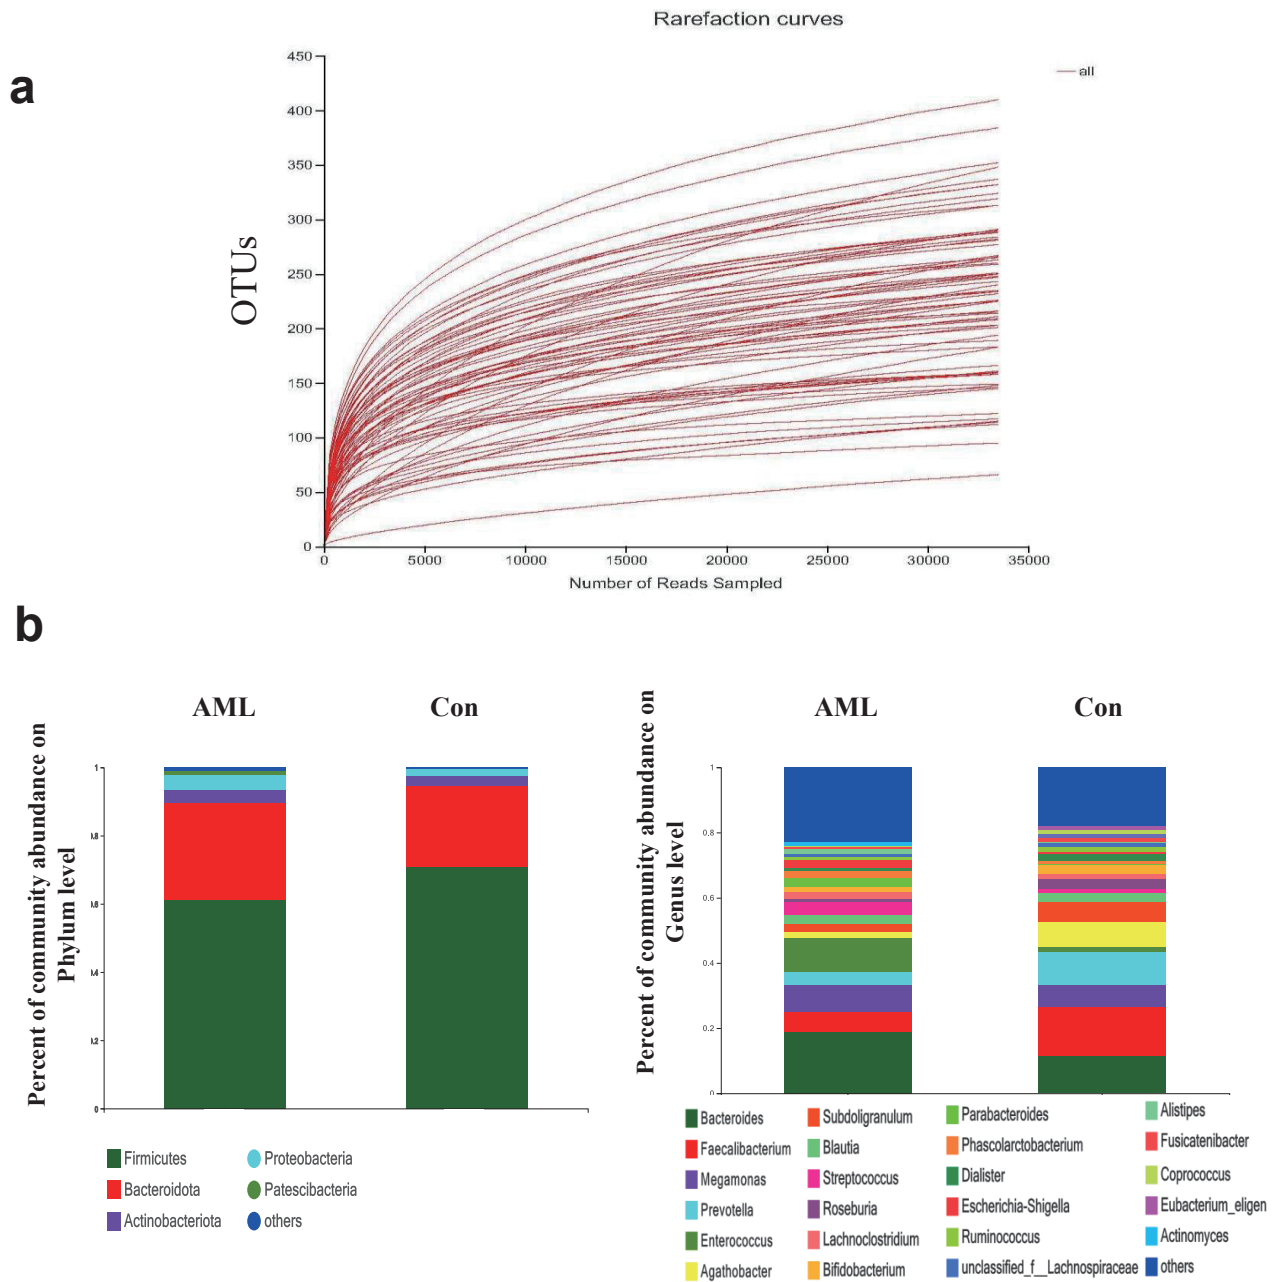

## Supplementary figure 1

**a** Rarefaction curves of 61 samples from AML patients and healthy controls.

**b** The difference in abundances of phylum and genus between the AML and control groups.

# Supplementary figure 2

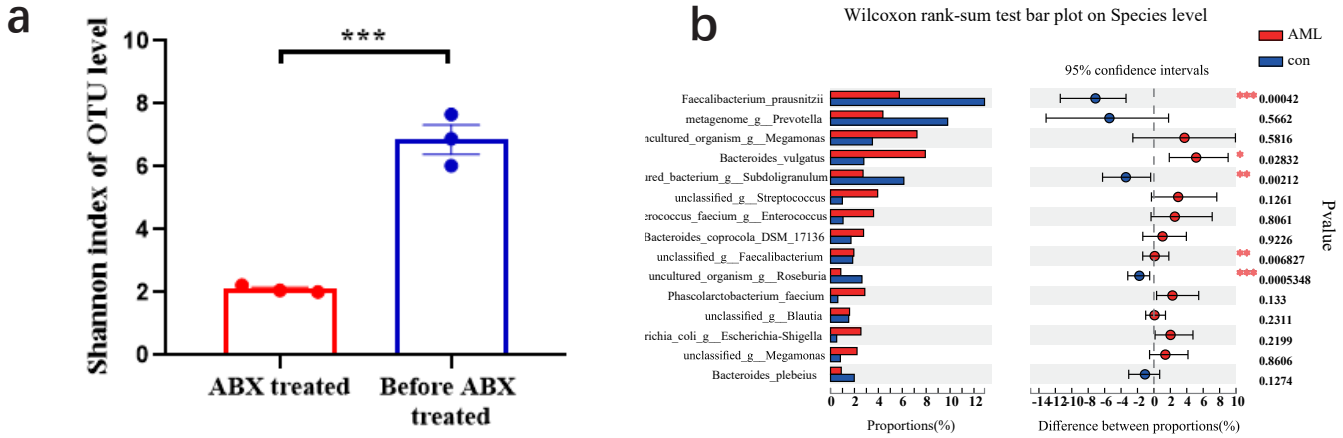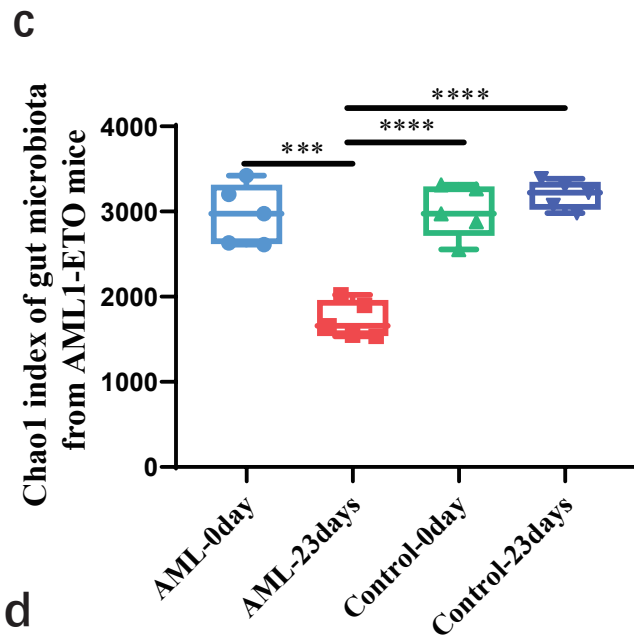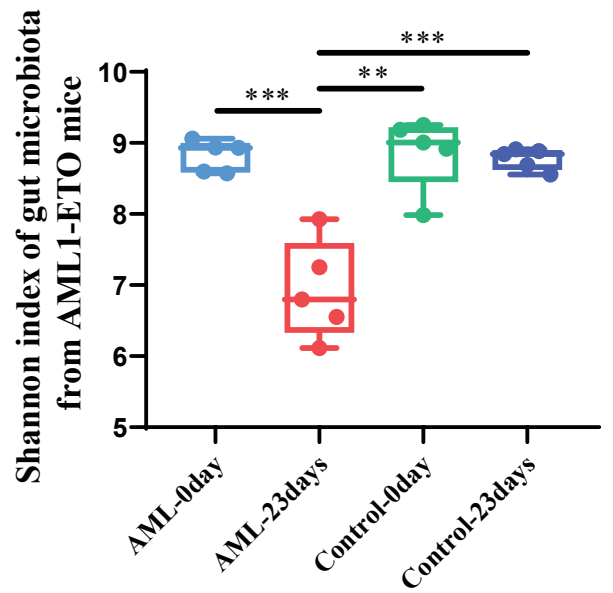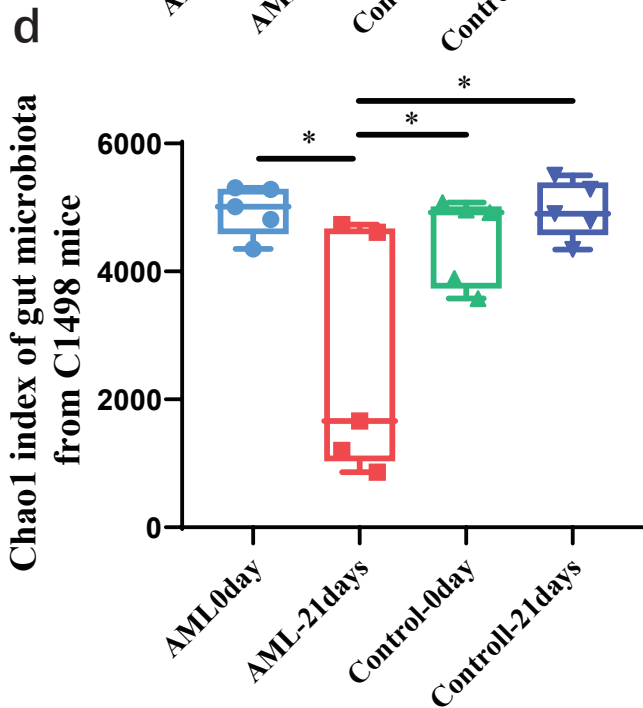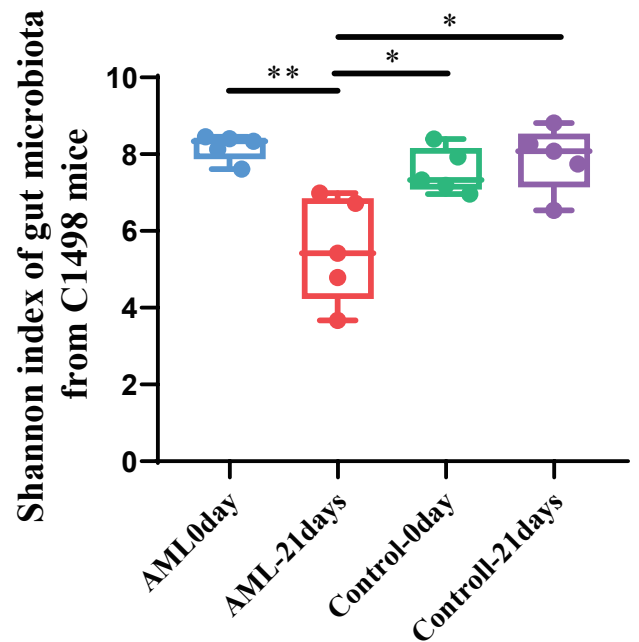

e

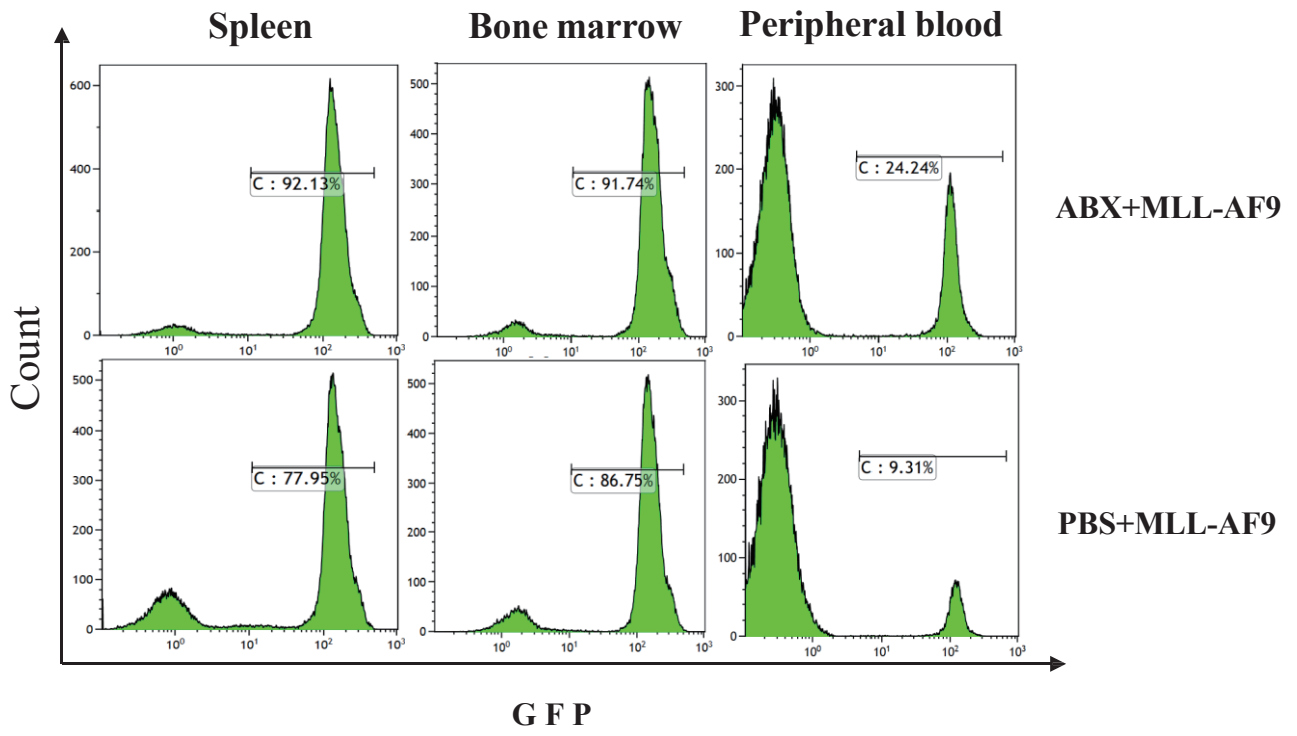

## Supplementary figure 2

**a** The diversity and abundance of the gut microbiota in ABX-treated and control mice. Unpaired t-test was used for comparing the Sob index (n=3 per group). **b** Relative OTUS taxon abundance comparison among the AML (n=31) and control groups (n=30). The mean is used to measure the centre of the error bar. **c** Chaol and shannon index of gut microbiota of AML1-ETO mice (n=5 per group). **d** Chaol and shannon index of gut microbiota of C1498 mice (n=5 per group). **c-d** Data were presented as standard boxplots (with the box encompassing Q1 to Q3, the median denoted as a central horizontal line in the box, and the whiskers covering the data within  $\pm 1.5$  IQR). **e** The representative FACS graphs of the leukemia cells (GFP<sup>+</sup> cells) in spleen, peripheral blood and bone marrow from ABX AML mice and control PBS AML mice. P-values were determined using Two-tailed t-test in **a**, **c**, **d** and Wilcoxon rank test in **b**. Error bars represent mean  $\pm$  SEM in **a-d**. \*\*\*p=0.0006 (**a**), \*\*\*p=0.0004 AML-23 days vs. AML-0 day shannon, \*\*p=0.001 Control-0 day vs. AML-23 days shannon, \*\*\*p=0.0004 Control-23 days vs. AML-23 days shannon, \*\*\*p=0.0002 AML-23 days vs. AML-0 day chao1, \*\*\*\*p<0.0001 Control-0 day vs. AML-23 days chao1, \*\*\*\*p<0.0001 Control-23 days vs. AML-23 days chao1 (**c**), \*\*p=0.003 AML-21 days vs. AML-0 day shannon, \*p=0.0157 Control-0 day vs. AML-21 days shannon, \*p=0.0113 Control-23 days vs. AML-21 days shannon, \*p=0.00273 AML-21 days vs. AML-0 day chao1, \*p=0.0157 Control-0 day vs. AML-21 days chao1, \*p=0.0113 Control-21 days vs. AML-21 days chao1 (**d**). Source data are provided as a Source Data file.

# Supplementary figure 3

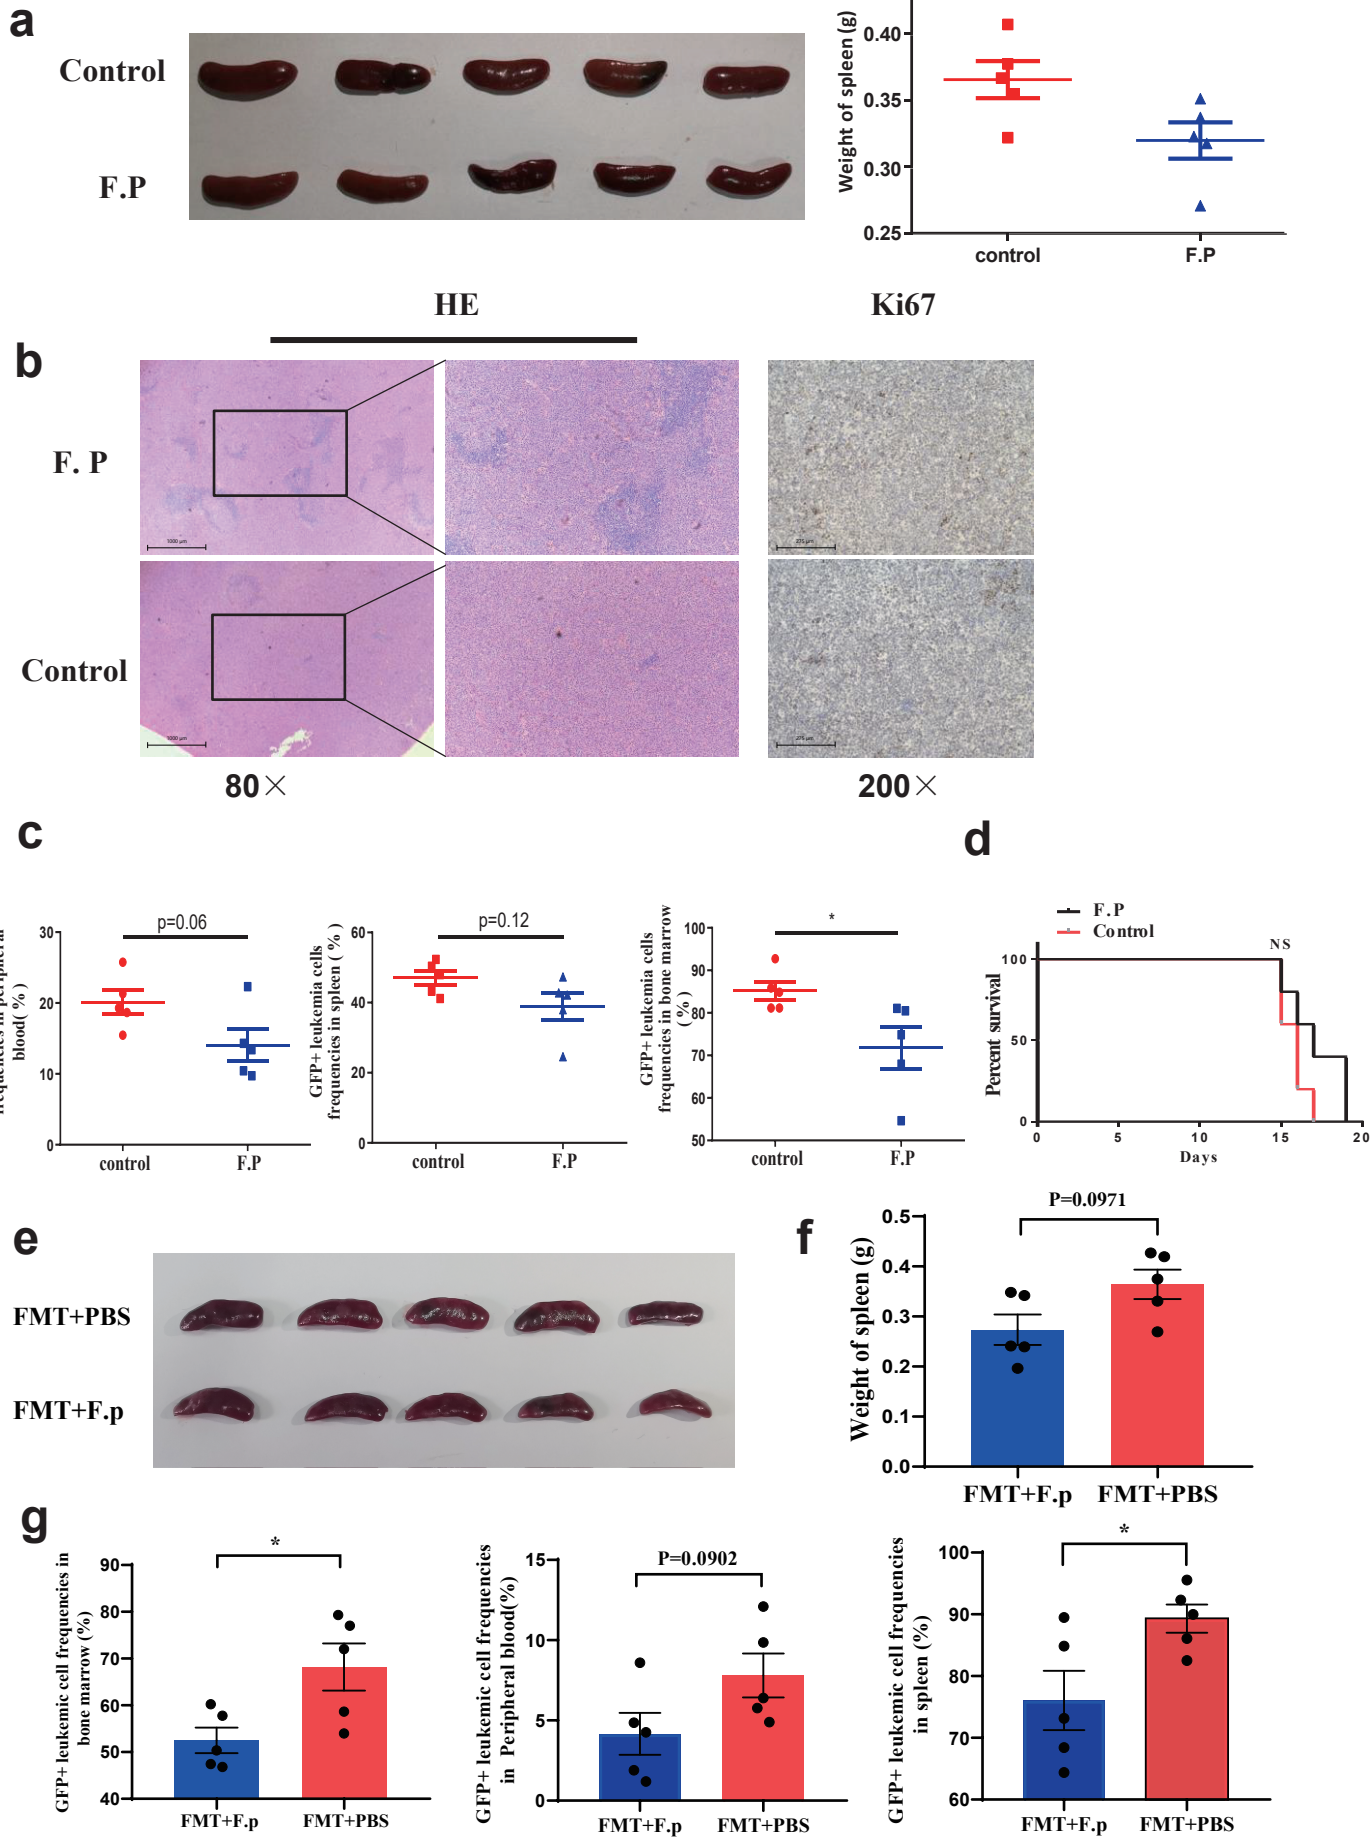

### Supplementary figure 3

**a** Photograph of spleens from FP treated AML mice (n=5) and control AML mice (n=5). **b** HE histopathology sections and Ki67 immunohistochemical staining of a representative spleen, F.P treated group and control group. All microscopic analyses were performed (original magnification x80 or x200), scale bar =1000 $\mu$ m and 275 $\mu$ m. **c** The cells (GFP+ cells) in the spleen, peripheral blood and bone marrow from F.P treated AML mice (n=5) and control AML mice (n=5). **d** Kaplan- Meier survival curve of AML mice (n=5 per group). **e** Photograph of spleens from AML mice treated with FP or without F.P (n=5 per group). **f** Weight of spleens from AML mice treated with F.P or without F.P (n=5 per group). P-values were determined using Two-tailed t-test in **a**, **c**, **f**, **g**. P-values were determined using Gehan-Breslow-Wilcoxon test in **d**. Error bars represent mean  $\pm$  SEM. \*p=0.0468(**a**), \*p=0.0366 BM (**c**), \*p=0.0258 SP, \*p=0.0376 BM (**g**). Source data are provided as a Source Data file.

Supplementary figure 4

a

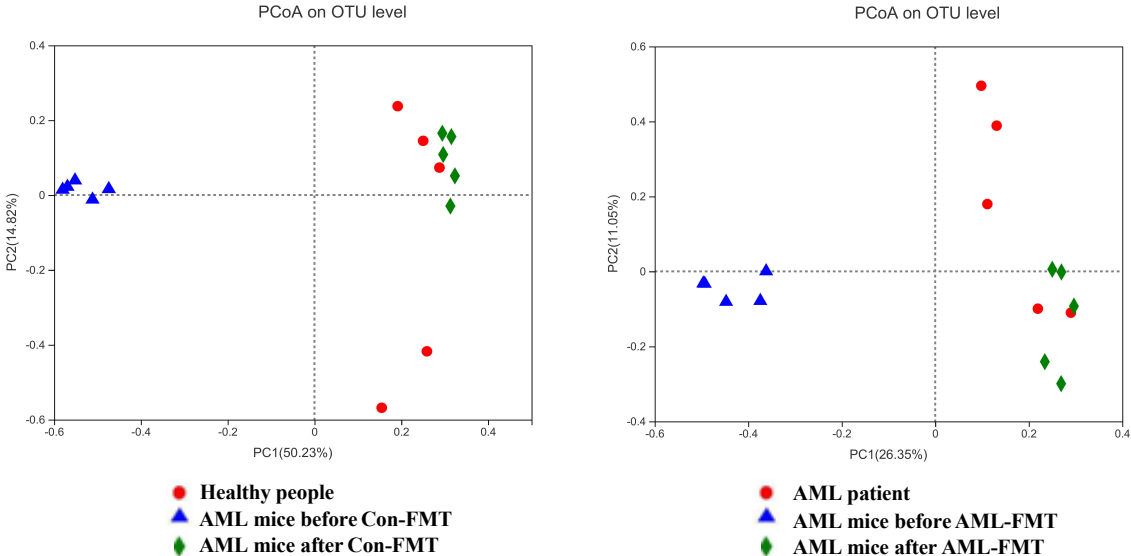

b

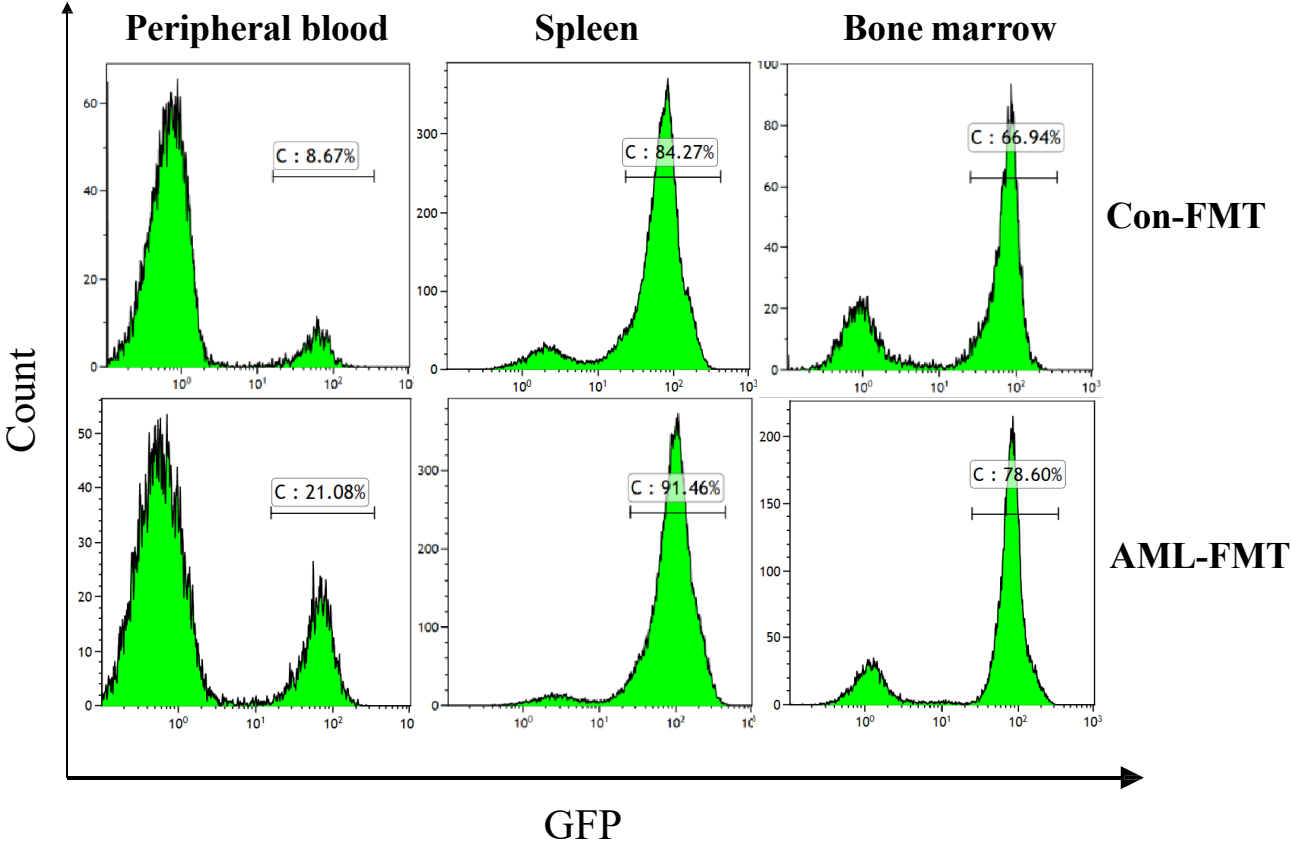

## **Supplementary figure 4**

**a** PCoA of a Weighted UniFrac distance analysis. **b** The representative FACS graphs of the leukaemia cells (GFP<sup>+</sup> cells) in spleen, peripheral blood and bone marrow.



# Supplementary figure 5

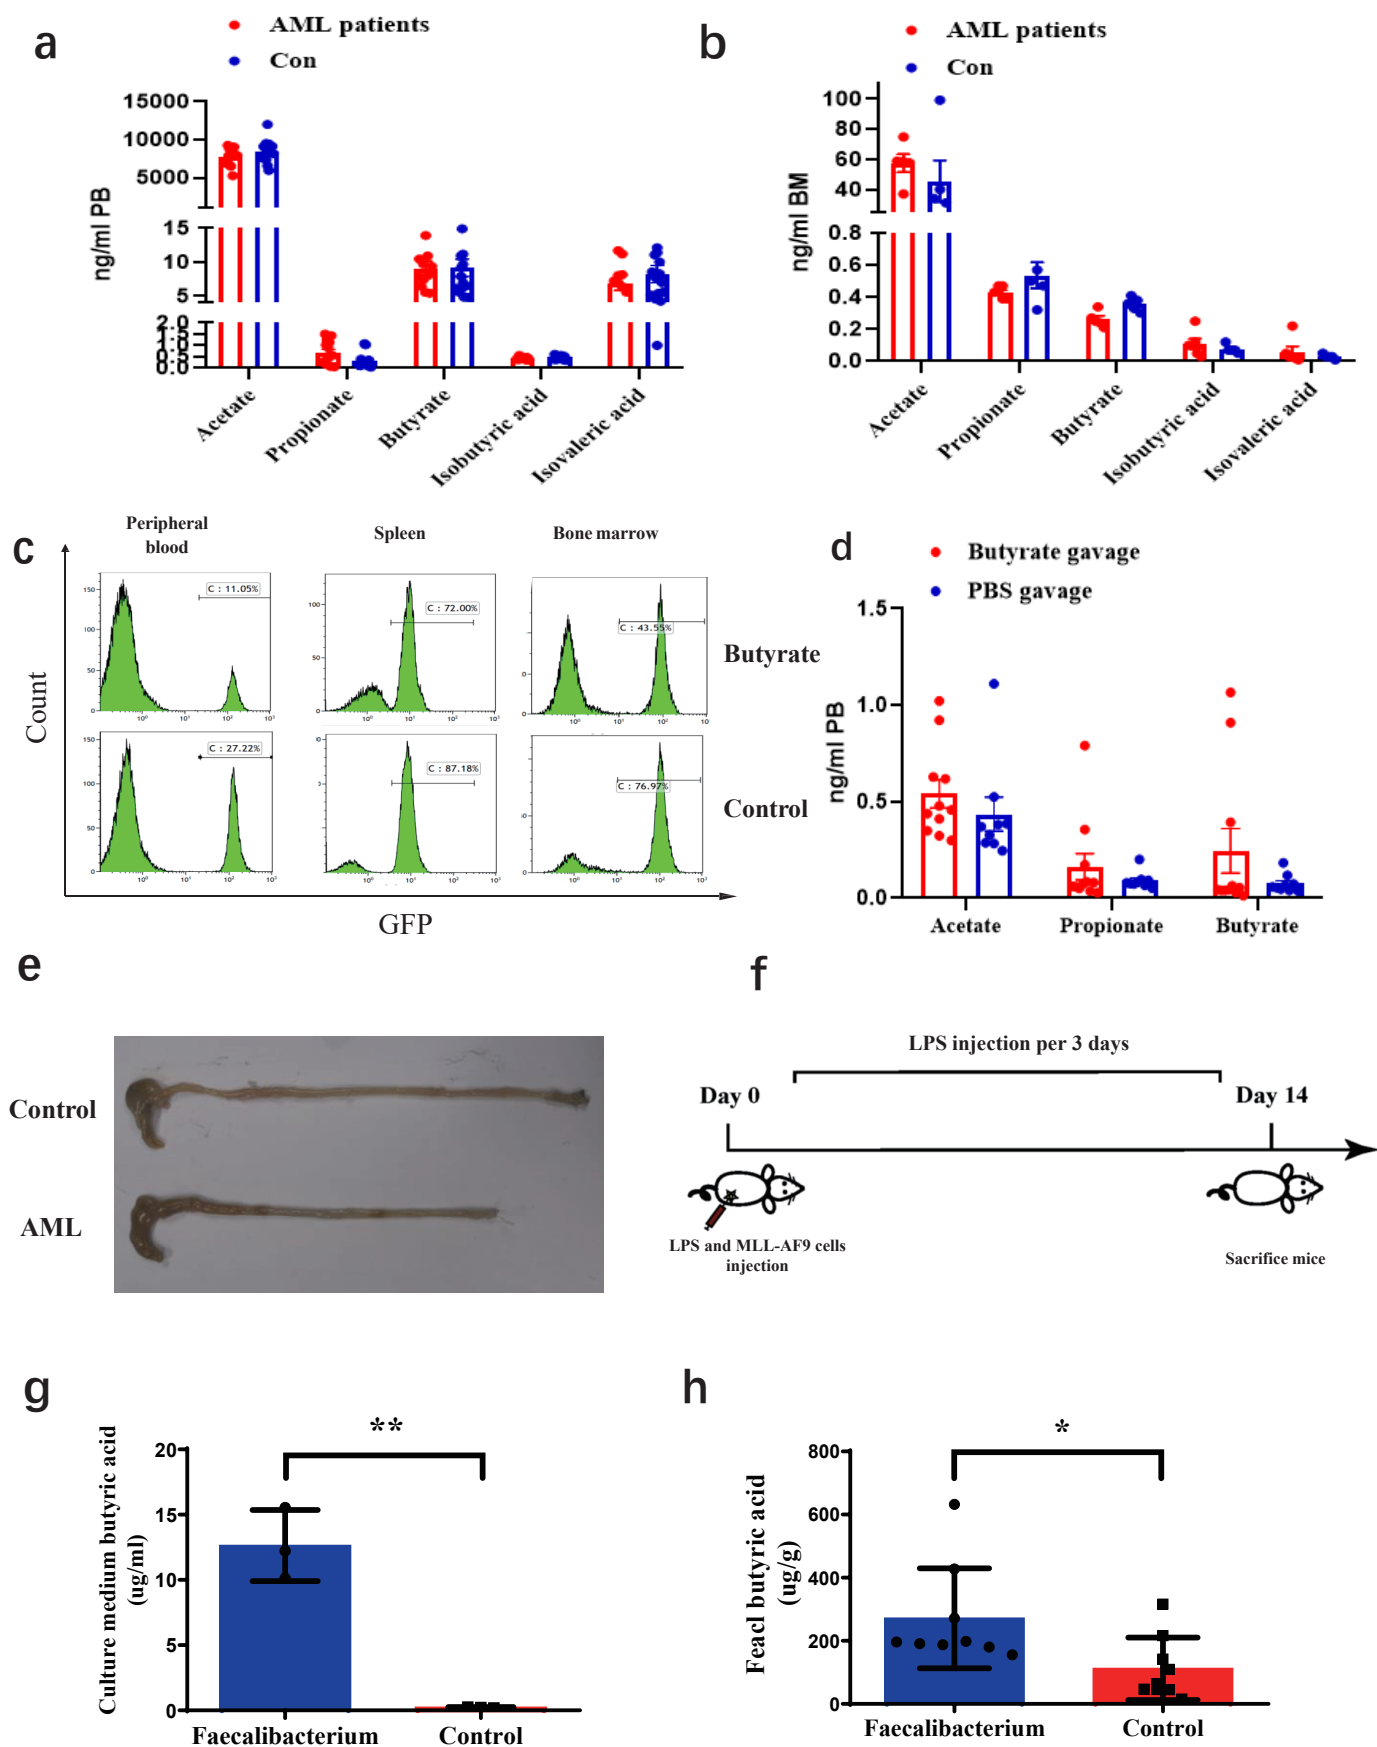

## Supplementary figure 5

**a** The concentrations of SCFAs in peripheral blood of AML patients (n=20) and controls (n=22). **b** The concentrations of SCFAs in bone marrow of AML patients (n=7) and controls (n=5). **c** The representative FACS graphs of the leukemia cells (GFP+ cells) in the spleen, peripheral blood and bone marrow. **d** The concentrations of SCFAs in blood samples of butyrate treatment mice (n=11) and controls (n=9). **e** The colon length of AML mice and control mice. **f** The schematic diagram of the mice experimental process including LPS treatment. **g** The concentration of butyrate in the supernatant of Faecalibacterium (n=3 per group). **h** The butyrate content in mice gavaged with Faecalibacterium compared with controls (n=9, per group). **g-h** All data are from the independent experiments. P-values were determined using Two-tailed t-test in **a, b, d, g, h**. Error bars represent mean  $\pm$  SEM. \*\*p=0.0014 (**g**), \*p=0.0207 (**h**). Source data are provided as a Source Data file.

# Supplementary figure 6

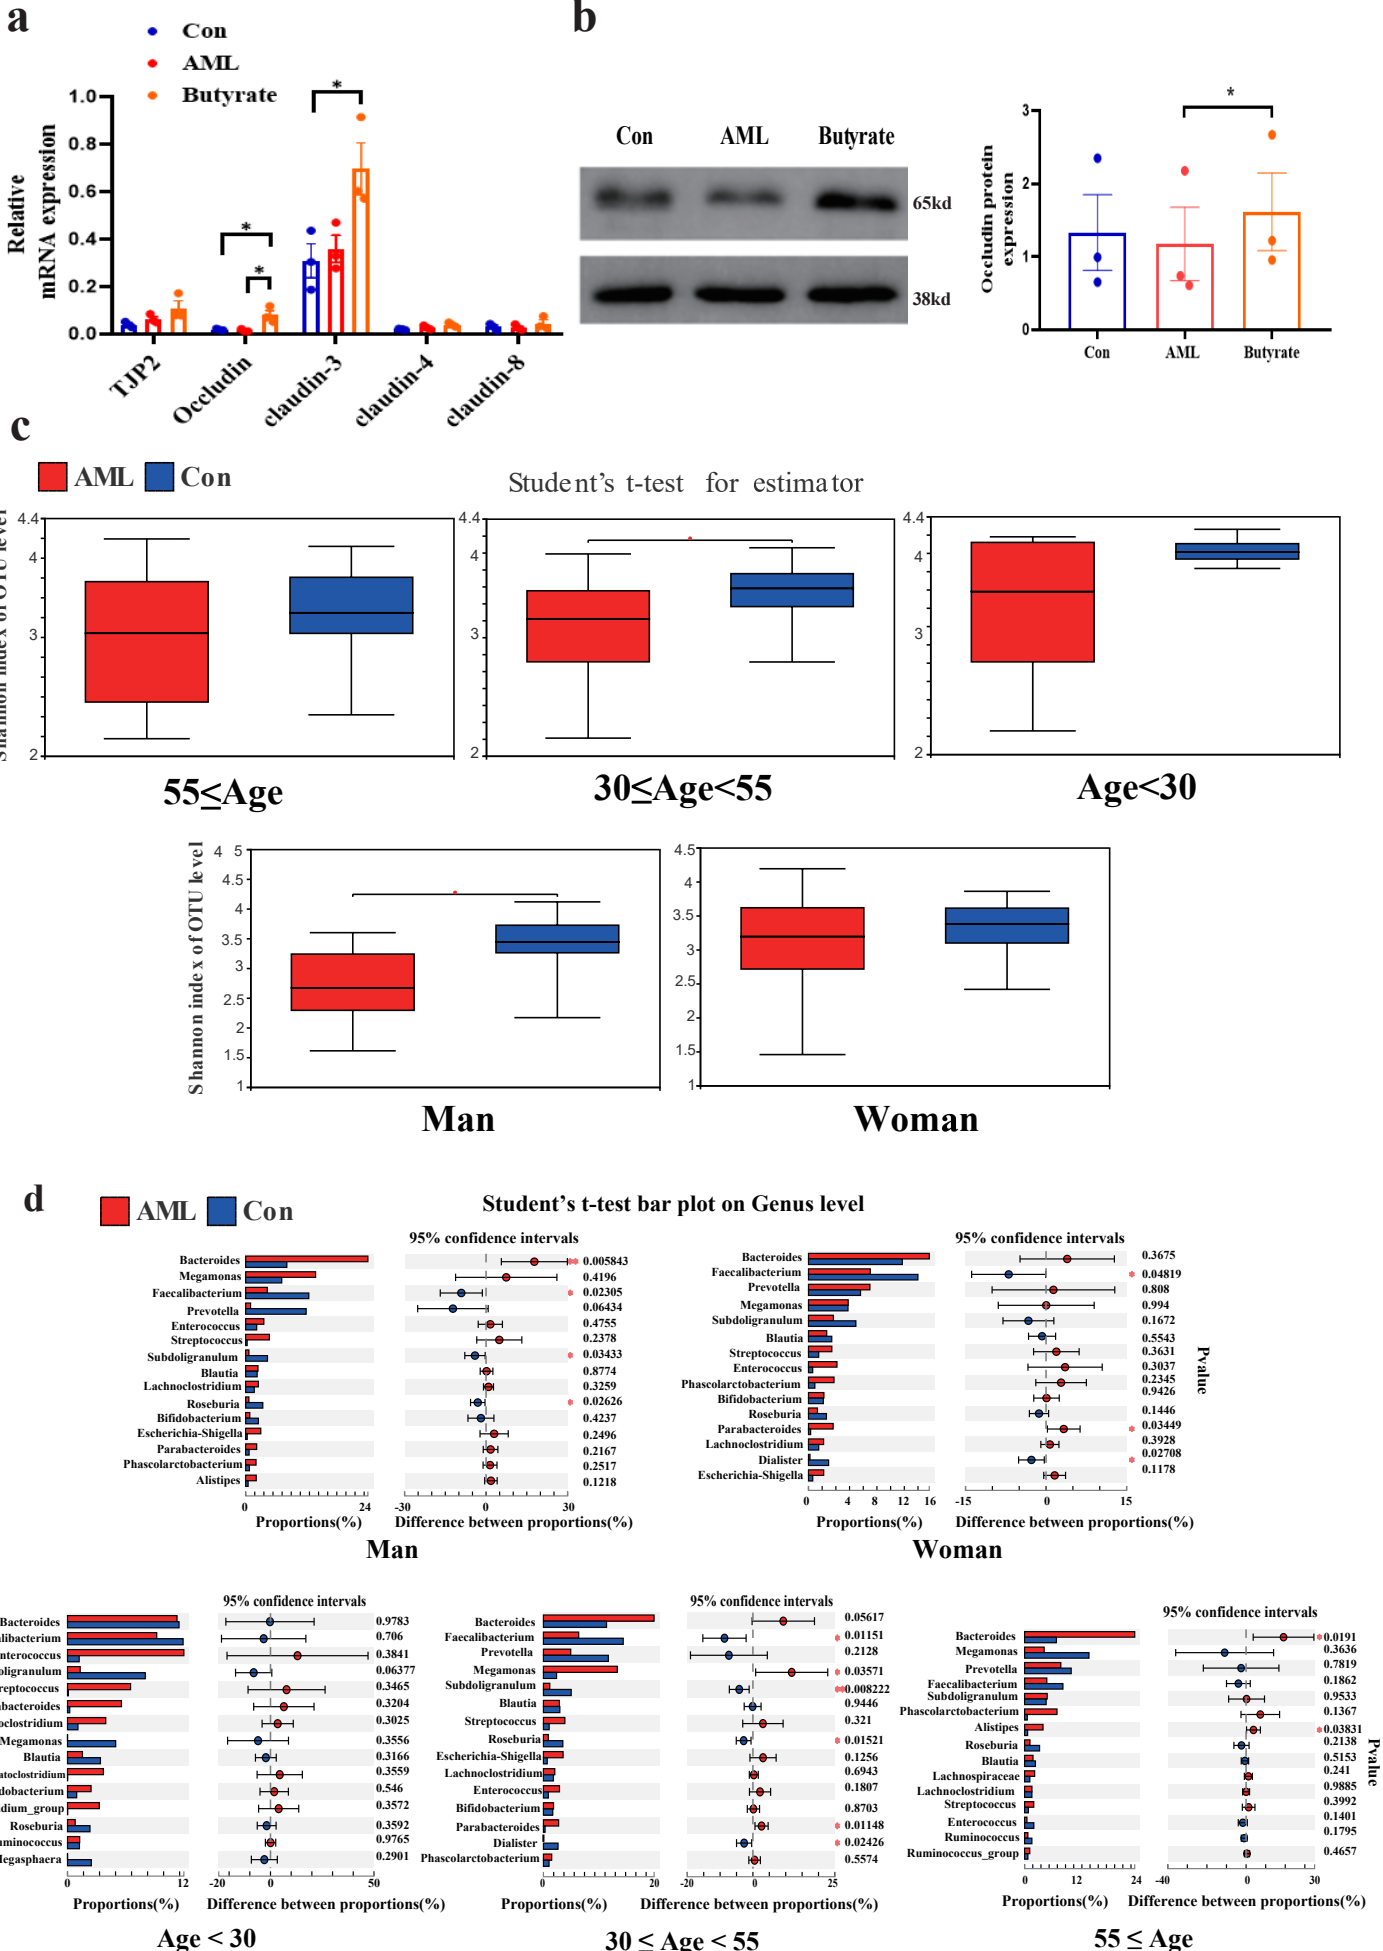

**e**

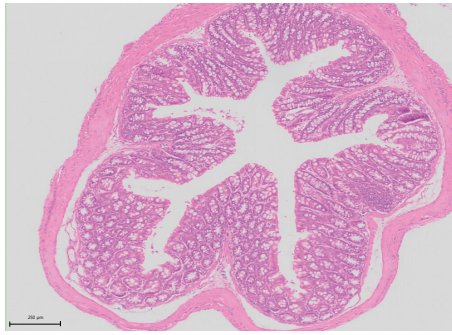

AML

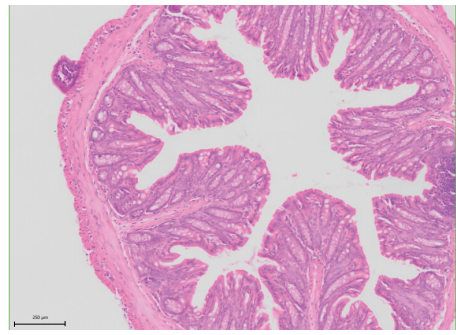

Control

**f**

Proximal  
colon

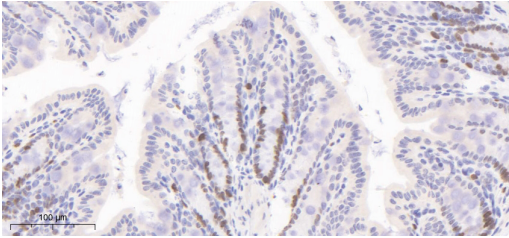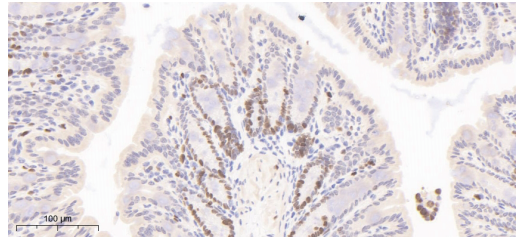

Distal  
colon

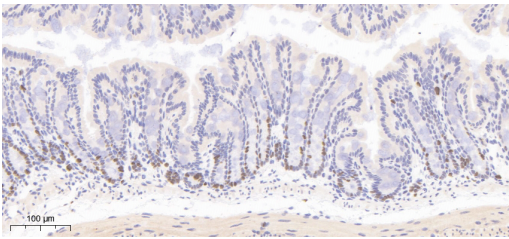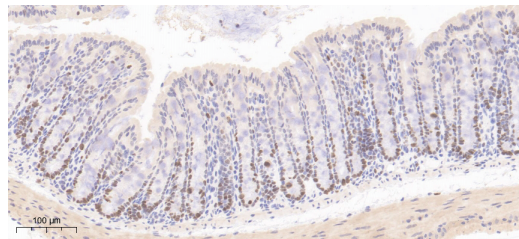

AML

Control

## Supplementary figure 6

**a** The mRNA expression levels of tight junction protein components TJP-2, occludin, claudin-3, claudin-4 and claudin-8 in intestinal epithelial cells of AML, control and butyrate-treatment mice (n=3 per group). **b** The protein levels of occluding in intestinal epithelial cells were determined by Western blot. GAPDH was used as the control (n=3, per group). **c** Diversity and richness of the gut microbiota in AML patients (AML) and healthy controls (Con) (differentiated by age and gender). The unpaired t test was used to compare the Shannon index (n=61). Data were presented as standard boxplots (with the box encompassing Q1 to Q3, the median denoted as a central horizontal line in the box, and the whiskers covering the data within  $\pm 1.5$  IQR). **d** Relative taxa abundance comparison among the AML and control groups (differentiated by age and gender) (n=61). The mean is used to measure the centre of the error bar. **e-f** The colon HE and Ki67 staining of AML and control mice, scale bar=250 $\mu$ m and 100 $\mu$ m. P-values were determined using Two-tailed t-test and error bars represent mean  $\pm$  SEM in **a-i**. \*p=0.0373 AML vs AML+ Butyrate (Occludin), \*p=0.0323 AML+ Butyrate vs Control (Occludin), \*p=0.0416 AML vs AML+ Butyrate (claudin-3) (**a**). \*p=0.0109 AML+Butyrate vs Control (Occludin) (**b**). \*p=0.01225 30<Age<55 group, \*p=0.01822 Man group (**c**). Source data are provided as a Source Data file.

## Supplementary figure 7

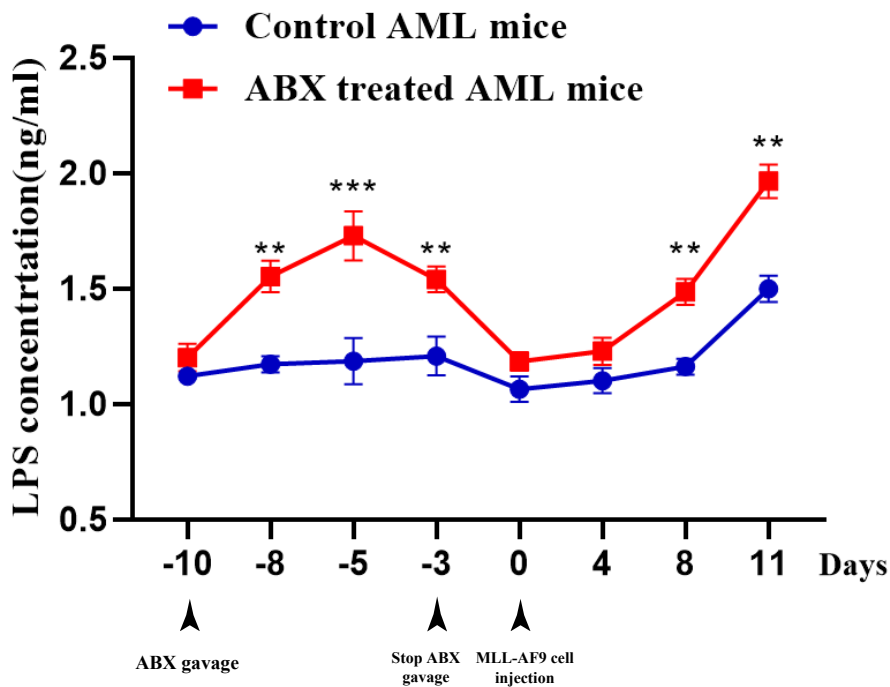

## Supplementary figure 7

LPS concentrations in the peripheral plasma of ABX treated AML mice and control AML mice (-10-11 days)(n=4 per group). P-values were determined using Two-tailed t-test and Error bars represent mean  $\pm$  SEM. \*\*p=0.002543 -8days, \*\*p=0.009798 -5days, \*p=0.016498 -3days, \*p=0.010607 8days, \*\*p=0.004464 11days. Source data are provided as a Source Data file.



# Supplementary figure 8

**a**

LPS+AML ABX+AML AML Butyrate+AML

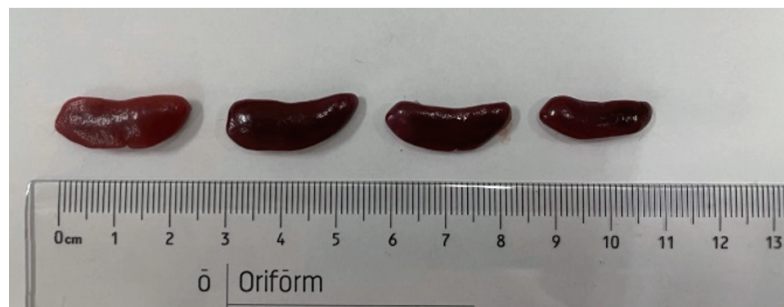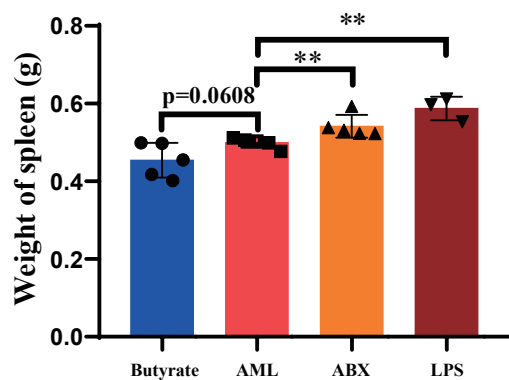

**b**

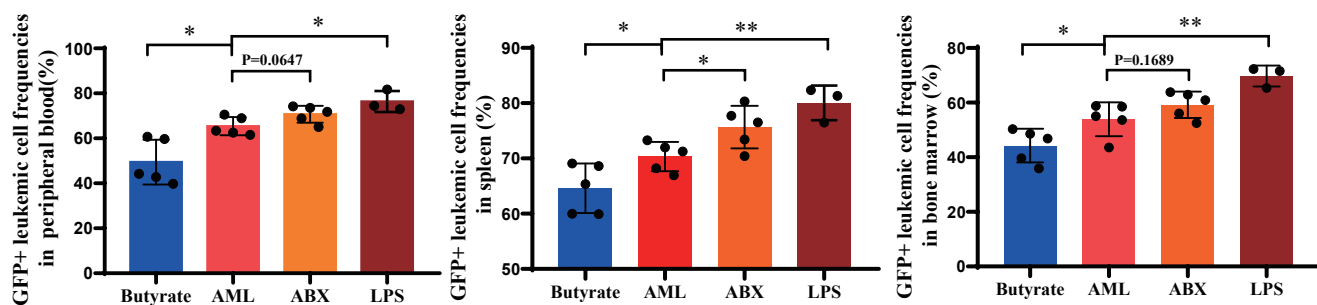

**c**

**Ki67**

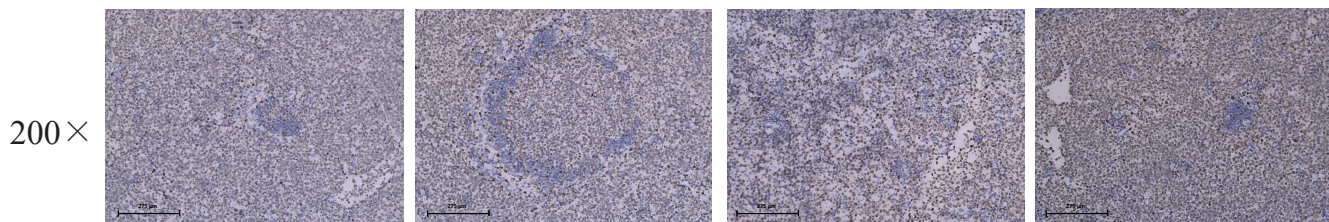

Butyrate+AML

AML

ABX+AML

LPS+AML

**HE**

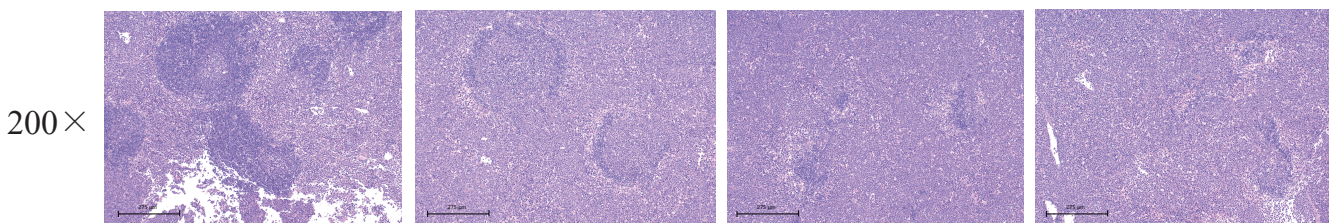

Butyrate+AML

AML

ABX+AML

LPS+AML

## Supplementary figure 8

**a** Photographs and weights of spleens from AML mice (n=5), butyrate treated AML mice (n=5), ABX treated AML mice (n=5) and LPS treated AML mice (n=3). **b** Leukaemia cells (GFP<sup>+</sup> cells) in the spleen, peripheral blood, and bone marrow from AML mice (n=5), butyrate treated AML mice (n=5), ABX treated AML mice (n=5) and LPS treated AML mice (n=3). **c** Ki67 immunohistochemical and HE histopathology sections staining of a representative spleen, AML mice, butyrate treated AML mice, ABX treated AML mice and LPS treated AML mice, scale bar = 275  $\mu$ m. P-values were determined using Two-tailed t-test and error bars represent mean  $\pm$  SEM in **a, b**. \*\*p=0.006265 AML vs ABX, \*\*p=0.00117 AML vs LPS (**a**), \*p=0.0105 AML vs Butyrate+AML PB, \*p=0.0126 AML vs LPS PB, \*p=0.0388 AML vs Butyrate+AML SP, \*p=0.0338 AML vs ABX SP, \*\*p=0.00328 AML vs LPS SP, \*p=0.0389 AML vs Butyrate+AML BM, \*\*p=0.0076 AML vs LPS BM (**b**). Source data are provided as a Source Data file.



# Supplementary figure 9

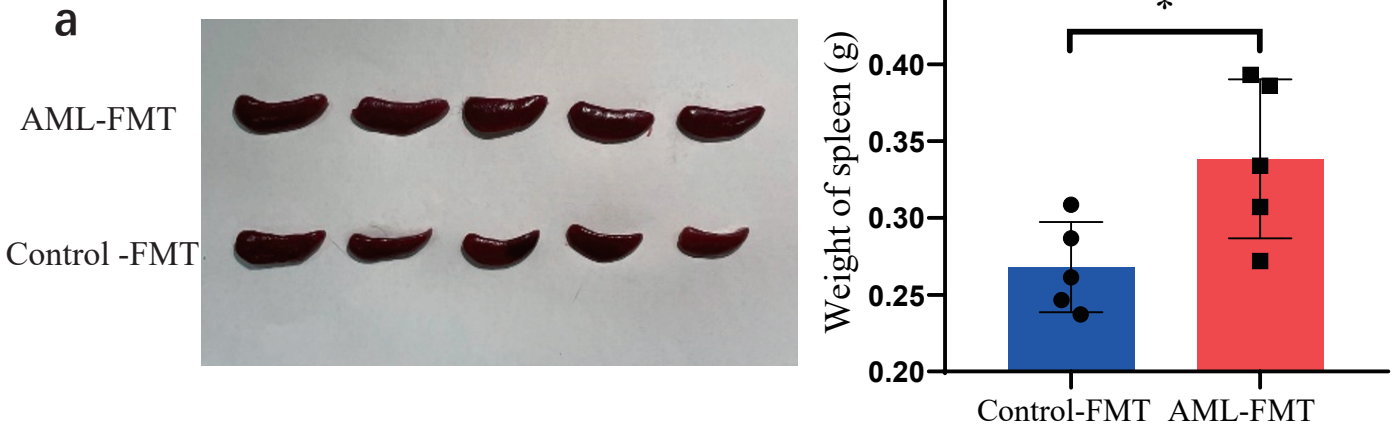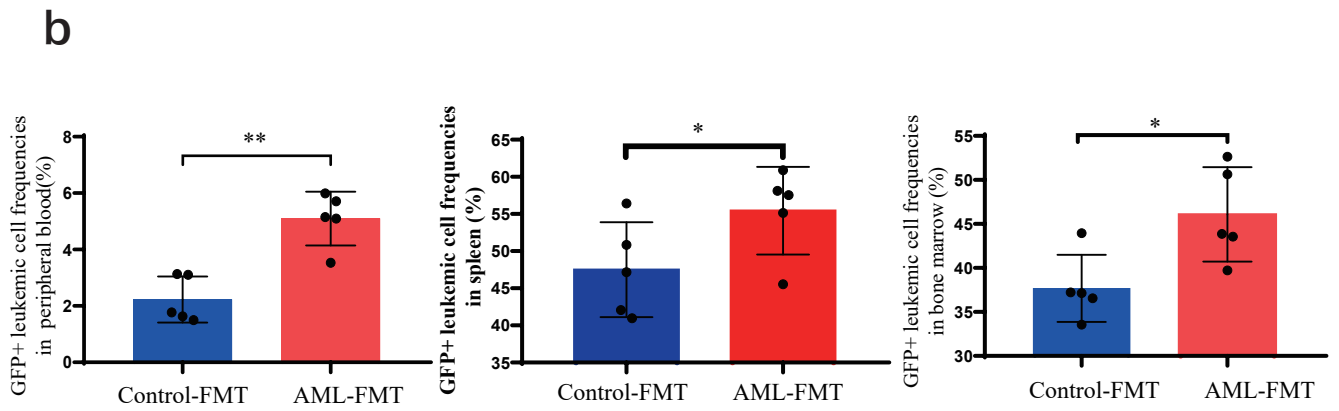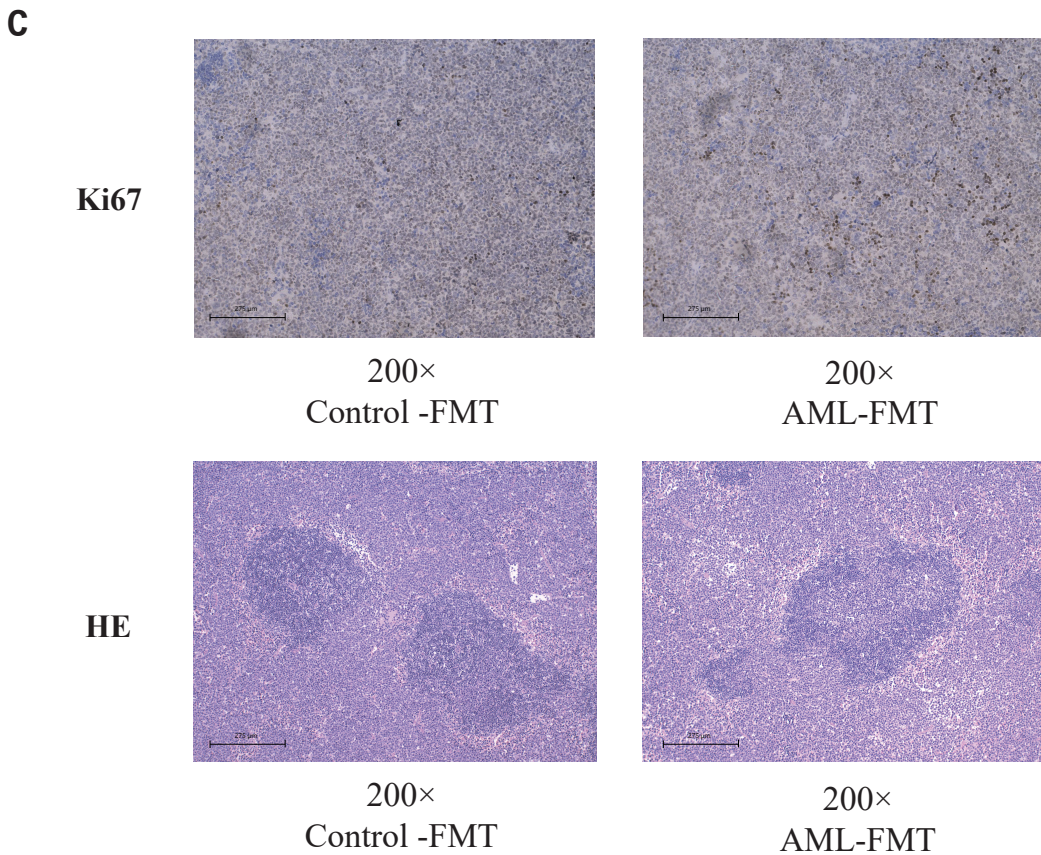

## Supplementary figure 9

**a** Photographs and weights of spleens from AML-FMT group (n=5) and Control-FMT group (n=5). **b** Leukaemia cells (GFP+ cells) in the spleen, peripheral blood, and bone marrow from AML- FMT group (n=5) and Control-FMT group (n=5). P-values were determined using Two-tailed t-test and error bars represent mean  $\pm$  SEM in **a**, **b**. **c** HE histopathology sections and Ki67 immunohistochemical staining of a representative spleen, AML- FMT group and Control-FMT group, scale bar=275  $\mu$ m. \*p=0.292 (**a**), \*\*\*p=0.0009 PB, \*P=0.0472 SP, \*p=0.0214 BM (**b**). Source data are provided as a Source Data file.

# Supplementary figure 10

**a**

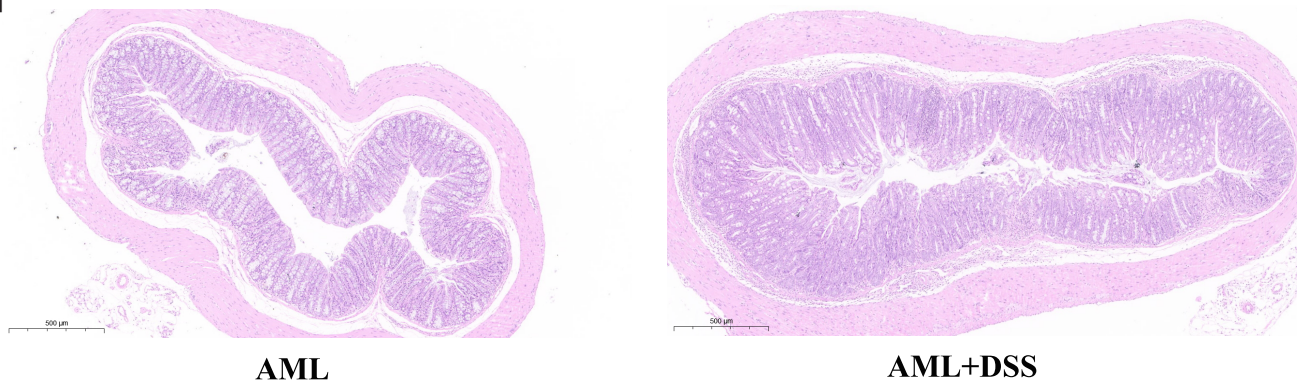

**AML**

**AML+DSS**

**b**

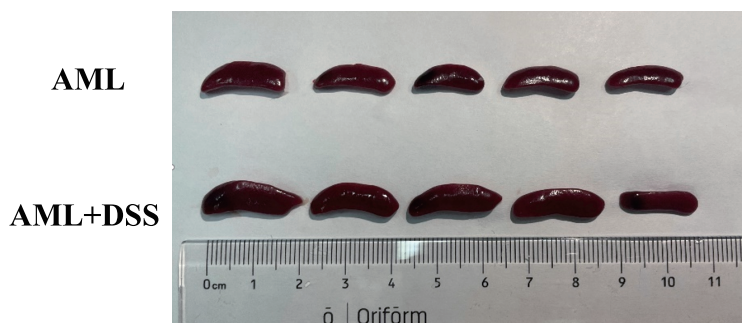

**AML**

**AML+DSS**

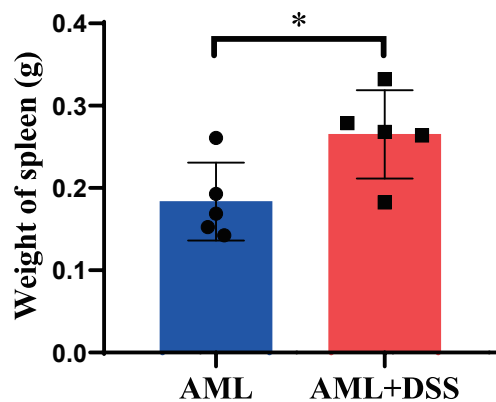

**c**

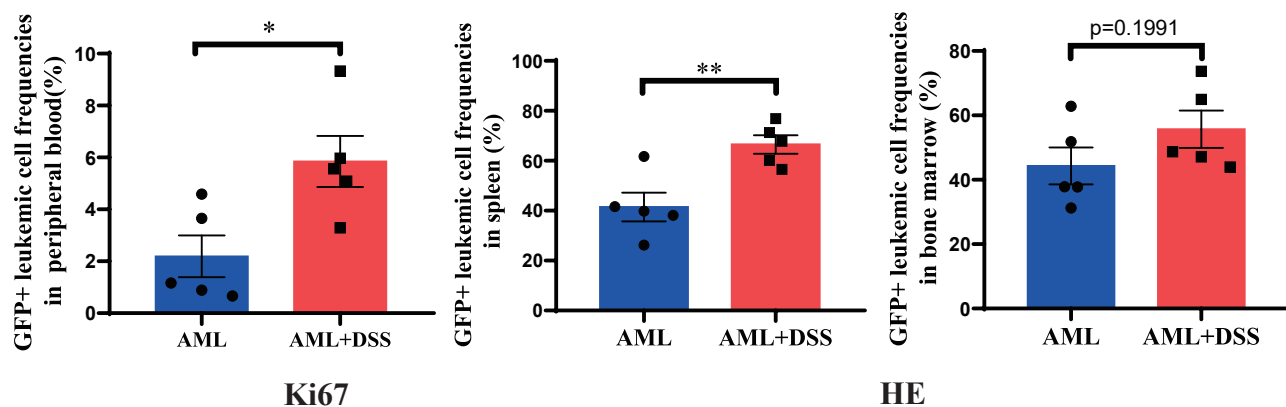

**Ki67**

**HE**

**d**

**400×  
AML**

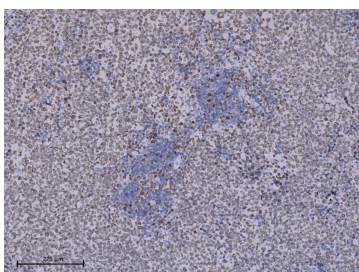

**400×  
AML+DSS**

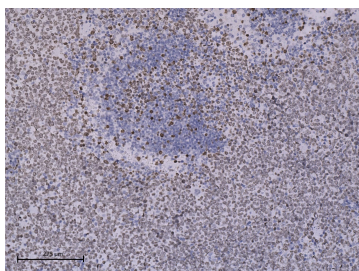

**e**

**200×  
AML**

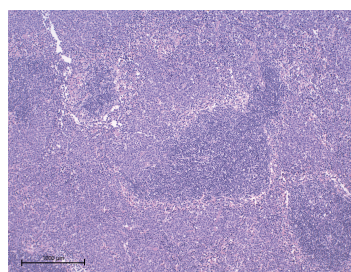

**200×  
AML+DSS**

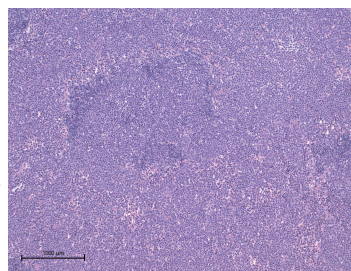

## Supplementary figure 10

**a** The colon HE staining of AML and DSS treated AML mice. **b** Photographs and weights of spleens from AML (n=5) and DSS treated AML mice (n=5), scale bar = 500 $\mu$ m. Three times each experiment was repeated independently with similar results. **c** Leukaemia cells (GFP<sup>+</sup> cells) in the spleen, peripheral blood, and bone marrow from AML (n=5) and DSS treated AML mice (n=5). **d** Ki67 immunohistochemical staining of a representative spleen from DSS-treated AML mice, and control AML mice. **e** HE histopathology sections staining of a representative spleen, DSS-treated AML mice, and control AML mice, scale bar=275  $\mu$ m. P-values were determined using Two-tailed t-test and error bars represent mean  $\pm$  SEM in **b**, **c**. \*p=0.034 (**b**), \*p=0.0205, \*\*p=0.0063 (**c**). Source data are provided as a Source Data file.



## Supplementary figure 11

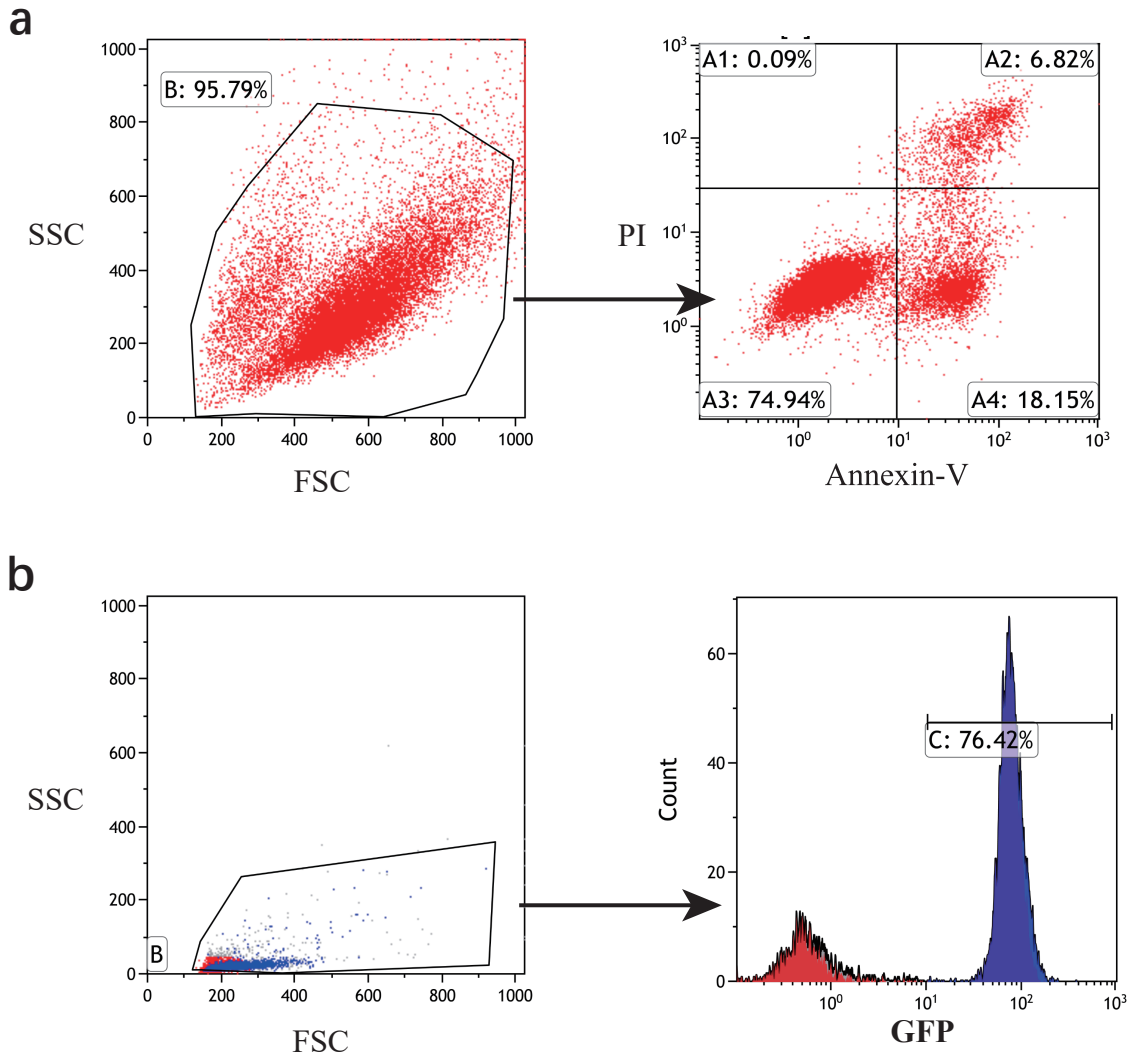

## Supplementary figure 11

**a** Gating strategy was used to identify apoptotic cells in mouse primary cells. Annexin-V was used to label early apoptotic cells, and Annexin-V and PI were used to label late apoptotic cells. **b** Gating strategy was used to identify GFP<sup>+</sup> cells in mouse peripheral blood, spleen and bone marrow cells.

**Supplementary table 1. Clinical and laboratory characteristics of the 31 AML cases and 30 controls.**

| <b>Characteristics</b>                                                  | <b>AML Patient</b> | <b>Healthy control</b> |
|-------------------------------------------------------------------------|--------------------|------------------------|
| Male/female                                                             | 15/16              | 15/15                  |
| Age at study entry, year, median (range)                                | 46 (15-69)         | 49 (20-73)             |
| Bone marrow blasts at diagnosis, %, median (range)                      | 73 (26-96)         | /                      |
| WBC at diagnosis, $\times 10^9/L$ , median (interquartile range)        | 31.7 (0.82-467)    | /                      |
| <b>Cytogenetic risk group, no./total no.</b>                            |                    |                        |
| Favorable                                                               | 9/31               | /                      |
| Unfavorable                                                             | 20/31              | /                      |
| Missing data                                                            | 2/31               | /                      |
| <b>Status after the first course of chemotherapy, no./total no. (%)</b> |                    |                        |
| CR                                                                      | 20/31              | /                      |
| Not CR                                                                  | 9/31               | /                      |
| Unavailable data                                                        | 2/31               | /                      |
| <b>AML FAB subtype, no./total no. (%)</b>                               |                    |                        |
| AML with minimal differentiation: M0                                    | 0/31               | /                      |
| AML without maturation: M1                                              | 1/31               | /                      |
| AML with maturation: M2                                                 | 2/31               | /                      |
| Acute Promyelocytic leukemia: M3                                        | 7/31               | /                      |
| Acute Myelomonocytic leukemia: M4                                       | 3/31               | /                      |
| Acute monoblastic or monocytic leukemia: M5                             | 14/31              | /                      |
| Acute erythroid leukemia: M6                                            | 0/31               | /                      |
| Acute megakaryoblastic leukemia: M7                                     | 0/31               | /                      |
| Other subtype                                                           | 4/31               | /                      |

WBC: white blood cell; CR: complete remission

## Supplementary table 2

### The sequences of PCR primers

| Gene       | Primers (5' - 3')       |                        |
|------------|-------------------------|------------------------|
|            | Forward                 | Reverse                |
| mClaudin-1 | AGGTCTGGCGACATTAGTGG    | TGGTGTTGGGTAAGAGGTTG   |
| mClaudin-2 | CTCCCTGGCCTGCATTATCTC   | ACCTGCTACCGCCACTCTGT   |
| mZO-1      | GCCGCTAAGAGCACAGCAA     | TCCCCACTCTGAAAATGAGGA  |
| mTJP2      | ATGGGAGCAGTACACCGTGA    | TGACCACCCTGTCATTTTCTTG |
| mOccludin  | TTGAAAGTCCACCTCCTTACAGA | CCGATAAAAAGAGTACGCTGG  |
| mClaudin-3 | ACCAACTGCGTACAAGACGAG   | CAGAGCCGCCAACAGGAAA    |
| mClaudin-4 | TGGAGGACGAGACCGTCAA     | CACGGGCACCATAATCAGCA   |
| mClaudin-8 | GCAACCTACGCTCTTCAAATGG  | TTCCCAGCGGTTCTCAAACAC  |
| mGAPDH     | GGACACTGAGCAAGAGAGGC    | TTATGGGGGTCTGGGATGGA   |

#### Risk classification standard

| Risk Category                                          | Genetic Abnormality                                                                                                                                                                                                                                                                                                                                                                                                                                                                                                                                                                      |
|--------------------------------------------------------|------------------------------------------------------------------------------------------------------------------------------------------------------------------------------------------------------------------------------------------------------------------------------------------------------------------------------------------------------------------------------------------------------------------------------------------------------------------------------------------------------------------------------------------------------------------------------------------|
| <b>Favorable-risk</b>                                  | t (8;21) (q22;q22.1);RUNX1-RUNX1T1<br>inv(16)(p13.1q22) or t(16;16)(p13.1;q22);CBFB-MYH11Biallelic mutated CEBPA<br>Mutated NPM1 without FLT3-ITD or with FLT3-ITD <sup>low</sup>                                                                                                                                                                                                                                                                                                                                                                                                        |
| <b>Unfavorable-risk<br/>(Intermediate and Adverse)</b> | Mutated NPM1 and FLT3-ITD <sup>high</sup><br>Wild-type NPM1 without FLT3-ITD or with FLT3-ITD <sup>low</sup> (without adverse-risk genetic lesions) t(9;11)(p21.3;q23.3);MLLT3-KMT2A<br>Cytogenetic abnormalities not classified as favorable or adverse<br>t(6;9)(p23;q34.1);DEK-NUP214t(v;11q23.3);KMT2A rearranged<br>t(9;22)(q34.1;q11.2);BCR-ABL1<br>inv(3)(q21.3q26.2) or t(3;3)(q21.3;q26.2);GATA2,MECOM(EV/1)-5 or del(5q);-7;-17/abn(17p)<br>Complex karyotype, monosomal karyotype   Wild-type NPM1 and FLT3-ITD <sup>high</sup><br>Mutated RUNX1, Mutated ASXL1, Mutated TP53 |

Reference: Acute Myeloid Leukemia, Version 3.2019, NCCN Clinical Practice Guidelines in Oncology

## Supplementary table 3

### Multiple linear regression analysis

| Variables               | Parameter Estimates |       |         |
|-------------------------|---------------------|-------|---------|
|                         | B                   | P     | Exp (B) |
| <i>Faecalibacterium</i> | -30.055             | 0.002 | -0.640  |
| <i>Roseburia</i>        | -3.518              | 0.638 | -0.087  |
| Age                     | -0.394              | 0.713 | -0.055  |

Dependent Variable: WBC; B: regression coefficient; Exp(B): The exponent of B; *Italic*: Bacterial species name

The risk classification standard is listed in supplementary Table 2

A two-tailed P-value < 0.05 was considered statistically significant

### Risk-prognosis assessment

|        | favorable | unfavorable | Total |
|--------|-----------|-------------|-------|
| CR     | 9         | 11          | 20    |
| Non-CR | 0         | 9           | 9     |
| Total  | 9         | 20          | 29    |

### Patients' information

|           | Gender | Positive genes         |
|-----------|--------|------------------------|
| Patient-1 | Male   | FLT3-ITD, NPM1, IDH2,  |
| Patient-2 | Male   | SRSF2 CEBPA            |
| Patient-3 | Male   | FLT3-ITD, NPM1, DNMT3A |
| Patient-4 | Female | CBFB-MYH11             |
| Patient-5 | Female | IDH2, NPM1             |
